# Supplementary material for: Enabling alternative ethylene production through its selective adsorption in the metal–organic framework Mn2(m-dobdc)
Source: Royal Society of Chemistry journal article supplement (doi:10.1039/c8ee01332b), 2018-01-01
Supplement: c8ee01332b1.pdf [file c8ee01332b1.pdf]

**Supplementary Information for:**

**Enabling Alternative Ethylene Production through Its Selective Adsorption in the Metal–Organic Framework  $\text{Mn}_2(m\text{-dobdc})$**

Jonathan E. Bachman, Douglas A. Reed, Matthew T. Kapelewski, Gaurav Chachra, Divya Jonnavittula, Guido Radaelli, and Jeffrey R. Long\*

\*email: [jrlong@berkeley.edu](mailto:jrlong@berkeley.edu)

### Breakthrough Simulation Model Configuration:

**Material Balance Assumption:** Plug flow without dispersion effects (convection only).

**Momentum Balance Assumption:** Gas velocity and pressure drop was represented by Ergun equation:

$$\frac{\partial P}{\partial z} = - \left( \frac{1.5 \times 10^{-3} (1 - \varepsilon_i)^2}{(2r_p \psi)^2 \varepsilon_i^3} \mu v_g + 1.75 \times 10^{-5} M \rho_g \frac{(1 - \varepsilon_i)}{2r_p \psi \varepsilon_i^3} v_g^2 \right)$$

**Kinetic Model Assumption:** Separate mass transfer resistances were lumped as a single overall factor:

$$\frac{\partial w_i}{\partial t} = MTC_{si}(w_i^* - w_i)$$

**Isotherm Model:** Dual site Langmuir Freundlich model, as fitted to the experimentally obtained equilibrium loading data, was used in the simulation:

$$w_i = \frac{IP_1 IP_2 P_i^{IP_3}}{1 + IP_1 IP_2 P_i^{IP_3}} + \frac{IP_4 IP_5 P_i^{IP_6}}{1 + IP_4 IP_5 P_i^{IP_6}}$$

**Energy Balance:** The simulation was set up to be isothermal since the experimental setup was kept under a water bath, to keep the system temperature to be nearly constant.

**Numerical Method:** First order upward differencing scheme was used as the numerical discretization method to solve the partial differential equations. The bed was divided in 20 nodes.

**Supplementary Table 1.** Dual-site Langmuir-Freundlich equation fits for CH<sub>4</sub>, CO, and CO<sub>2</sub> in Mn<sub>2</sub>(*m*-dobdc).

|                                    | CH <sub>4</sub> |       |       | CO <sub>2</sub> |       |       | CO    |       |       |
|------------------------------------|-----------------|-------|-------|-----------------|-------|-------|-------|-------|-------|
| <i>T</i> (°C)                      | 25              | 35    | 45    | 25              | 35    | 45    | 25    | 35    | 45    |
| <i>q</i> <sub>sat,a</sub> (mmol/g) | 4.513           | 6.498 | 5.555 | 7.019           | 6.527 | 6.232 | 5.565 | 5.264 | 5.103 |
| <i>b</i> <sub>a</sub> (1/bar)      | 0.342           | 0.188 | 0.157 | 5.772           | 4.322 | 2.883 | 1.610 | 1.228 | 0.912 |
| <i>v</i> <sub>a</sub>              | 1.036           | 1.003 | 1.001 | 0.977           | 1.003 | 0.995 | 0.925 | 0.949 | 0.968 |
| <i>q</i> <sub>sat,b</sub> (mmol/g) | 0               | 0     | 0     | 3.491           | 3.244 | 3.099 | 0     | 0     | 0     |
| <i>b</i> <sub>b</sub> (1/bar)      | n/a             | n/a   | n/a   | 0.280           | 0.274 | 0.281 | n/a   | n/a   | n/a   |
| <i>v</i> <sub>b</sub>              | n/a             | n/a   | n/a   | 1.761           | 1.404 | 1.088 | n/a   | n/a   | n/a   |

**Supplementary Table 2.** Dual-site Langmuir-Freundlich equation fits for ethylene and ethane in  $\text{Mn}_2(m\text{-dobdc})$

| $T$ (°C)                    | Ethylene |       |       | Ethane |       |       |
|-----------------------------|----------|-------|-------|--------|-------|-------|
|                             | 25       | 35    | 45    | 25     | 35    | 45    |
| $q_{\text{sat,a}}$ (mmol/g) | 5.603    | 5.451 | 5.421 | 6.854  | 7.727 | 6.700 |
| $b_a$ (1/bar)               | 73.02    | 48.25 | 30.43 | 6.228  | 4.080 | 2.606 |
| $v_a$                       | 0.854    | 0.868 | 0.876 | 1.170  | 1.173 | 1.153 |
| $q_{\text{sat,b}}$ (mmol/g) | 23.94    | 10.72 | 9.560 | 0      | 0     | 0     |
| $b_b$ (1/bar)               | 0.057    | 0.116 | 0.109 | n/a    | n/a   | n/a   |
| $v_b$                       | 0.727    | 0.646 | 0.632 | n/a    | n/a   | n/a   |

**Supplementary Table 3.** Dual-site Langmuir-Freundlich equation fits for  $\text{CH}_4$ ,  $\text{CO}$ , and  $\text{CO}_2$  in  $\text{Fe}_2(m\text{-dobdc})$

| $T$ (°C)                    | $\text{CH}_4$ |       |       | $\text{CO}_2$ |       |       | $\text{CO}$ |       |       |
|-----------------------------|---------------|-------|-------|---------------|-------|-------|-------------|-------|-------|
|                             | 25            | 35    | 45    | 25            | 35    | 45    | 25          | 35    | 45    |
| $q_{\text{sat,a}}$ (mmol/g) | 4.812         | 14.00 | 14.90 | 10.06         | 7.126 | 6.921 | 5.656       | 5.749 | 5.435 |
| $b_a$ (1/bar)               | 0.235         | 0.083 | 0.022 | 0.324         | 4.227 | 2.825 | 0.207       | 10.65 | 7.912 |
| $v_a$                       | 1.073         | 0.963 | 0.847 | 0.691         | 1.020 | 1.019 | 0.410       | 0.866 | 0.895 |
| $q_{\text{sat,b}}$ (mmol/g) | 9.740         | 0     | 0     | 4.723         | 1.606 | 1.540 | 4.842       | 0.794 | 1.125 |
| $b_b$ (1/bar)               | 0.044         | n/a   | n/a   | 11.25         | 0.336 | 0.342 | 29.03       | 0.233 | 0.343 |
| $v_b$                       | 0.843         | n/a   | n/a   | 1.138         | 1.885 | 1.477 | 0.967       | 1.405 | 1.079 |

**Supplementary Table 4.** Dual-site Langmuir-Freundlich equation fits for ethylene and ethane in  $\text{Fe}_2(m\text{-dobdc})$

| $T$ (°C)                    | Ethylene |       |       | Ethane |       |       |
|-----------------------------|----------|-------|-------|--------|-------|-------|
|                             | 25       | 35    | 45    | 25     | 35    | 45    |
| $q_{\text{sat,a}}$ (mmol/g) | 5.657    | 5.288 | 5.479 | 4.907  | 4.250 | 3.485 |
| $b_a$ (1/bar)               | 59.52    | 48.99 | 28.01 | 9.727  | 6.895 | 4.924 |
| $v_a$                       | 0.735    | 0.771 | 0.776 | 1.254  | 1.295 | 1.344 |
| $q_{\text{sat,b}}$ (mmol/g) | 3.841    | 4.255 | 7.464 | 3.274  | 3.703 | 4.049 |
| $b_b$ (1/bar)               | 0.503    | 0.500 | 0.173 | 0.876  | 0.947 | 1.004 |
| $v_b$                       | 0.790    | 0.593 | 0.576 | 0.700  | 0.761 | 0.818 |

**Supplementary Table 5.** Dual-site Langmuir-Freundlich equation fits for CH<sub>4</sub>, CO, and CO<sub>2</sub> in Co<sub>2</sub>(*m*-dobdc)

|                                    | CH <sub>4</sub> |       |       | CO <sub>2</sub> |       |       | CO    |       |       |
|------------------------------------|-----------------|-------|-------|-----------------|-------|-------|-------|-------|-------|
| <i>T</i> (°C)                      | 25              | 35    | 45    | 25              | 35    | 45    | 25    | 35    | 45    |
| <i>q</i> <sub>sat,a</sub> (mmol/g) | 9.874           | 9.035 | 8.270 | 7.162           | 3.286 | 2.354 | 6.078 | 3.614 | 3.324 |
| <i>b</i> <sub>a</sub> (1/bar)      | 0.182           | 0.157 | 0.137 | 10.21           | 14.20 | 9.258 | 71.42 | 94.97 | 85.06 |
| <i>v</i> <sub>a</sub>              | 0.990           | 0.998 | 0.999 | 1.041           | 1.214 | 1.249 | 0.877 | 0.953 | 0.996 |
| <i>q</i> <sub>sat,b</sub> (mmol/g) | 0               | 0     | 0     | 2.079           | 5.354 | 5.958 | 0.909 | 2.659 | 2.868 |
| <i>b</i> <sub>b</sub> (1/bar)      | n/a             | n/a   | n/a   | 0.370           | 1.822 | 1.816 | 0.207 | 13.46 | 10.94 |
| <i>v</i> <sub>b</sub>              | n/a             | n/a   | n/a   | 2.357           | 0.841 | 0.889 | 0.878 | 0.807 | 0.918 |

**Supplementary Table 6.** Dual-site Langmuir-Freundlich equation fits for ethylene and ethane in Co<sub>2</sub>(*m*-dobdc)

|                                    | Ethylene |       |       | Ethane |       |       |
|------------------------------------|----------|-------|-------|--------|-------|-------|
| <i>T</i> (°C)                      | 25       | 35    | 45    | 25     | 35    | 45    |
| <i>q</i> <sub>sat,a</sub> (mmol/g) | 5.968    | 5.983 | 5.850 | 5.756  | 3.409 | 0.178 |
| <i>b</i> <sub>a</sub> (1/bar)      | 79.89    | 45.60 | 29.82 | 8.88   | 0.362 | 82.65 |
| <i>v</i> <sub>a</sub>              | 0.869    | 0.866 | 0.876 | 1.133  | 0.707 | 2.270 |
| <i>q</i> <sub>sat,b</sub> (mmol/g) | 4.917    | 9.454 | 3.615 | 3.724  | 5.561 | 6.697 |
| <i>b</i> <sub>b</sub> (1/bar)      | 0.293    | 0.108 | 0.321 | 0.362  | 5.767 | 2.725 |
| <i>v</i> <sub>b</sub>              | 0.838    | 0.760 | 0.719 | 0.684  | 1.130 | 1.033 |

**Supplementary Table 7.** Dual-site Langmuir-Freundlich equation fits for CH<sub>4</sub>, CO, and CO<sub>2</sub> in Ni<sub>2</sub>(*m*-dobdc)

|                                    | CH <sub>4</sub> |       |       | CO <sub>2</sub> |       |       | CO    |       |       |
|------------------------------------|-----------------|-------|-------|-----------------|-------|-------|-------|-------|-------|
| <i>T</i> (°C)                      | 25              | 35    | 45    | 25              | 35    | 45    | 25    | 35    | 45    |
| <i>q</i> <sub>sat,a</sub> (mmol/g) | 9.215           | 8.715 | 8.335 | 5.763           | 5.872 | 6.072 | 4.750 | 5.538 | 4.083 |
| <i>b</i> <sub>a</sub> (1/bar)      | 0.199           | 0.165 | 0.137 | 29.39           | 16.74 | 9.459 | 217.3 | 59.31 | 87.44 |
| <i>v</i> <sub>a</sub>              | 0.996           | 1.011 | 1.010 | 1.036           | 1.024 | 1.017 | 0.879 | 0.784 | 0.869 |
| <i>q</i> <sub>sat,b</sub> (mmol/g) | 0               | 0     | 0     | 3.796           | 1.706 | 1.679 | 1.084 | 0.224 | 1.577 |
| <i>b</i> <sub>b</sub> (1/bar)      | n/a             | n/a   | n/a   | 0.489           | 0.942 | 0.400 | 6.149 | 6.924 | 14.01 |
| <i>v</i> <sub>b</sub>              | n/a             | n/a   | n/a   | 1.357           | 1.692 | 2.037 | 0.617 | 2.105 | 0.910 |

**Supplementary Table 8.** Dual-site Langmuir-Freundlich equation fits for ethylene and ethane in  $\text{Ni}_2(m\text{-dobdc})$ .

| $T$ (°C)                    | Ethylene |       |       | Ethane |       |       |
|-----------------------------|----------|-------|-------|--------|-------|-------|
|                             | 25       | 35    | 45    | 25     | 35    | 45    |
| $q_{\text{sat,a}}$ (mmol/g) | 5.496    | 5.304 | 5.631 | 6.666  | 6.510 | 6.321 |
| $b_a$ (1/bar)               | 52.14    | 38.07 | 21.79 | 6.824  | 4.804 | 3.460 |
| $v_a$                       | 0.755    | 0.777 | 0.776 | 1.046  | 1.063 | 1.075 |
| $q_{\text{sat,b}}$ (mmol/g) | 5.558    | 6.990 | 1.003 | 0      | 0     | 0     |
| $b_b$ (1/bar)               | 0.267    | 0.192 | 1.784 | n/a    | n/a   | n/a   |
| $v_b$                       | 0.866    | 0.727 | 1.774 | n/a    | n/a   | n/a   |

**Supplementary Table 9.** Dual-site Langmuir-Freundlich equation fits for  $\text{CH}_4$ ,  $\text{CO}$ , and  $\text{CO}_2$  in zeolite CaX.

| $T$ (°C)                    | $\text{CH}_4$ |       |       | $\text{CO}_2$ |       |       | $\text{CO}$ |       |       |
|-----------------------------|---------------|-------|-------|---------------|-------|-------|-------------|-------|-------|
|                             | 25            | 35    | 45    | 25            | 35    | 45    | 25          | 35    | 45    |
| $q_{\text{sat,a}}$ (mmol/g) | 2.761         | 2.532 | 1.933 | 6.011         | 6.573 | 7.009 | 1.275       | 1.256 | 1.290 |
| $b_a$ (1/bar)               | 0.302         | 0.281 | 0.299 | 3.211         | 2.047 | 1.380 | 0.923       | 0.817 | 0.670 |
| $v_a$                       | 0.876         | 0.902 | 0.936 | 0.674         | 0.620 | 0.597 | 1.088       | 1.037 | 0.991 |
| $q_{\text{sat,b}}$ (mmol/g) | n/a           | n/a   | n/a   | 0.485         | 0.285 | 0.203 | 0.568       | 0.480 | 0.410 |
| $b_b$ (1/bar)               | n/a           | n/a   | n/a   | 1522          | 1573  | 1466  | 23.91       | 21.84 | 17.00 |
| $v_b$                       | n/a           | n/a   | n/a   | 1.326         | 1.233 | 1.265 | 0.933       | 0.977 | 1.007 |

**Supplementary Table 10.** Dual-site Langmuir-Freundlich equation fits for ethylene and ethane in zeolite CaX.

| $T$ (°C)                    | Ethylene |       |       | Ethane |       |       |
|-----------------------------|----------|-------|-------|--------|-------|-------|
|                             | 25       | 35    | 45    | 25     | 35    | 45    |
| $q_{\text{sat,a}}$ (mmol/g) | 2.845    | 3.353 | 3.873 | 2.858  | 0.348 | 0.327 |
| $b_a$ (1/bar)               | 2.498    | 2.040 | 1.701 | 3.793  | 0.079 | 0.074 |
| $v_a$                       | 0.604    | 0.534 | 0.477 | 1.269  | 0.481 | 0.672 |
| $q_{\text{sat,b}}$ (mmol/g) | 1.051    | 0.644 | 0.287 | 0.377  | 4.198 | 4.460 |
| $b_b$ (1/bar)               | 28.59    | 52.25 | 1488  | 42.10  | 1.301 | 0.904 |
| $v_b$                       | 0.477    | 0.513 | 0.848 | 0.979  | 0.861 | 0.860 |

**Supplementary Table 11.** Mass transfer coefficients used in breakthrough simulations.

| Gas             | Value                   |
|-----------------|-------------------------|
| <i>Ethylene</i> | $0.0125 \text{ s}^{-1}$ |
| <i>Ethane</i>   | $0.0037 \text{ s}^{-1}$ |
| $\text{CO}_2$   | $0.01 \text{ s}^{-1}$   |
| $\text{CO}$     | $0.0125 \text{ s}^{-1}$ |
| <i>Methane</i>  | $0.004 \text{ s}^{-1}$  |

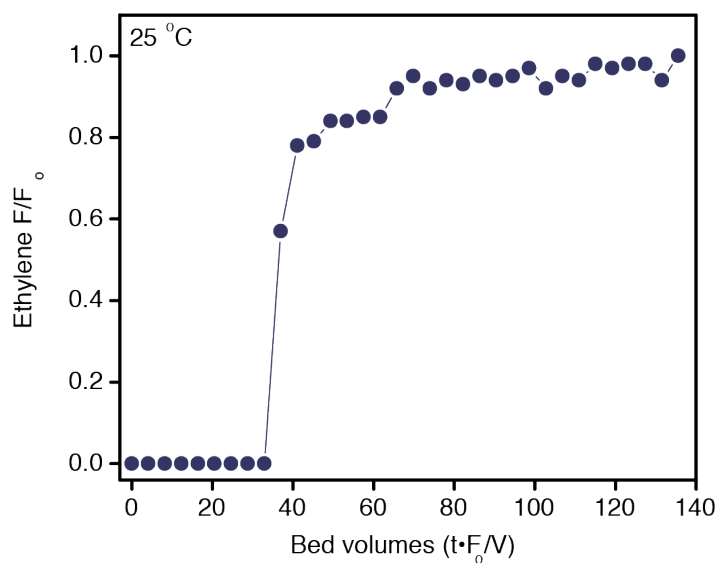

**Supplementary Figure 1.** Single-component transient breakthrough curve of ethylene in  $\text{Mn}_2(m\text{-dobdc})$ . Breakthrough capacity was determined to be 6.81 mmol/g.

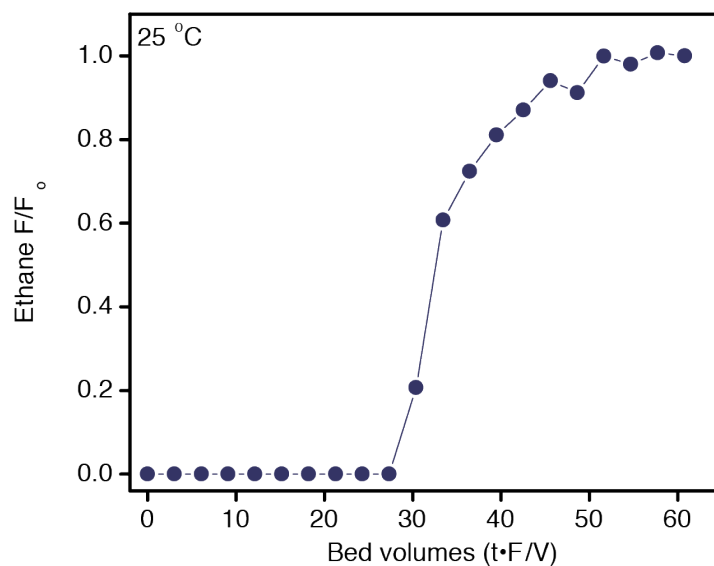

**Supplementary Figure 2.** Single-component transient breakthrough curve of ethane in  $\text{Mn}_2(m\text{-dobdc})$ . Breakthrough capacity was determined to be 6.31 mmol/g.

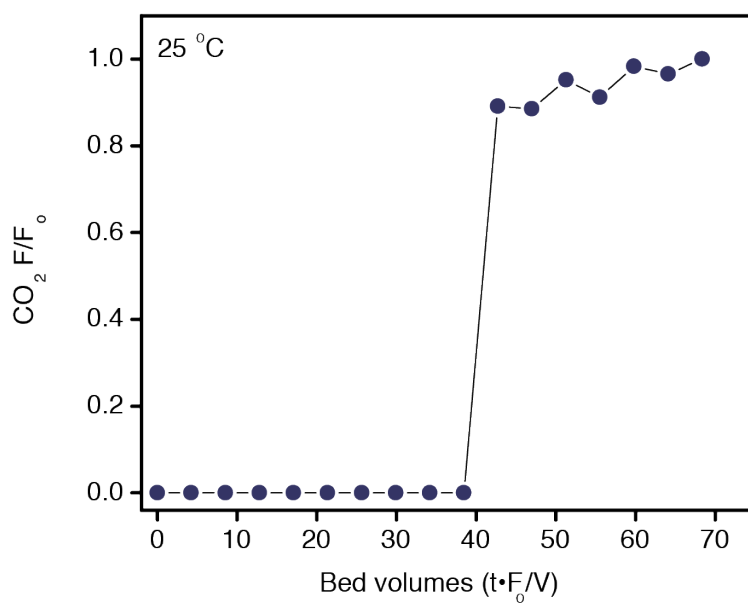

**Supplementary Figure 3.** Single-component transient breakthrough curve of  $CO_2$  in  $Mn_2(m\text{-dobdc})$ . Breakthrough capacity was determined to be 4.67 mmol/g.

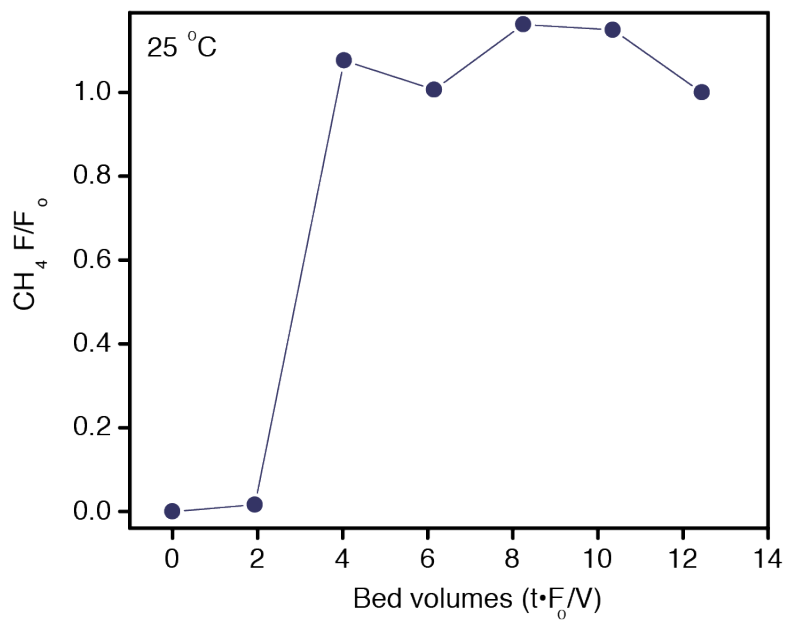

**Supplementary Figure 4.** Single-component transient breakthrough curve of  $CH_4$  in  $Mn_2(m\text{-dobdc})$ . Breakthrough capacity was determined to be 0.09 mmol/g.

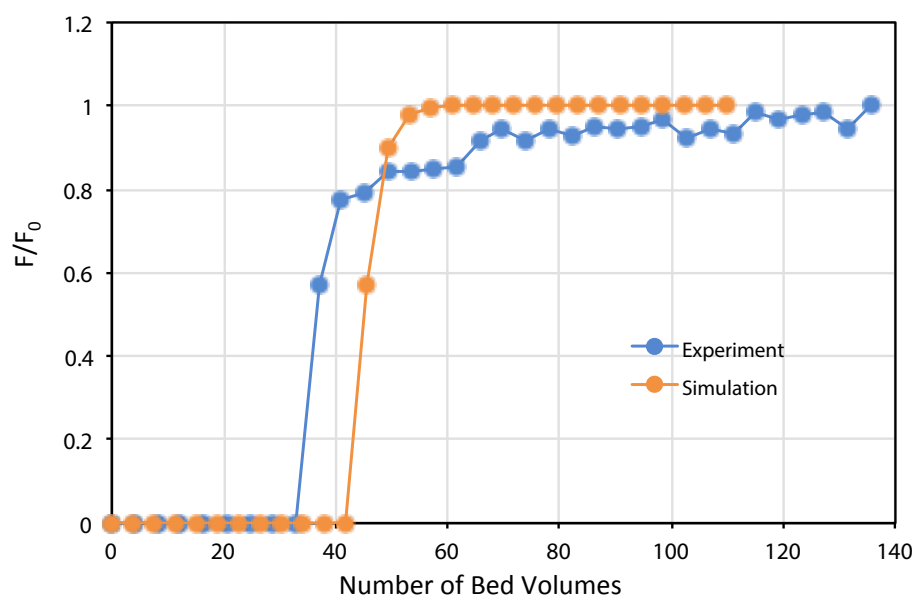

**Supplementary Figure 5.** Single component ethylene breakthrough simulation and experiment. Simulations were performed using experimentally determined equilibrium isotherms and mass transfer coefficients were fit to match the breakthrough curve.

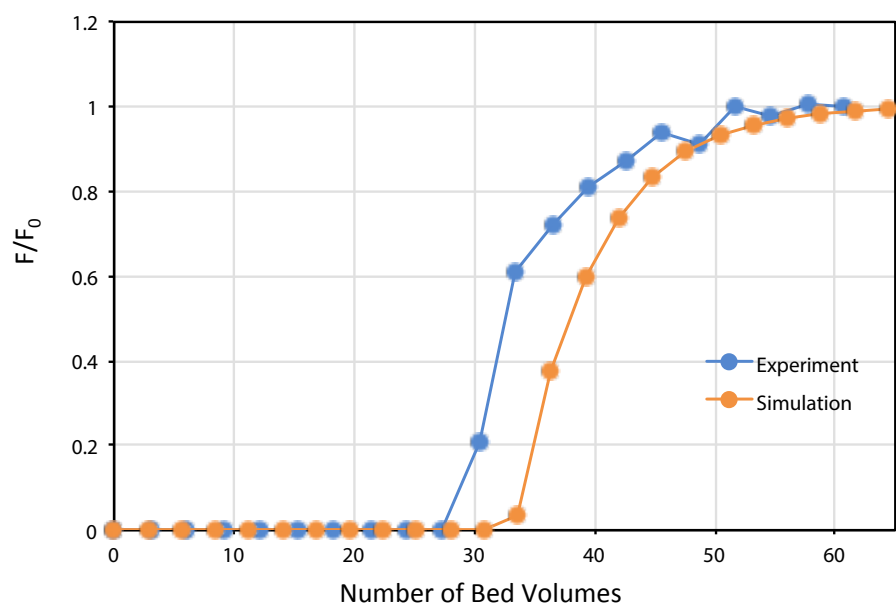

**Supplementary Figure 6.** Single component ethane breakthrough simulation and experiment. Simulations were performed using experimentally determined equilibrium isotherms and mass transfer coefficients were fit to match the breakthrough curve.



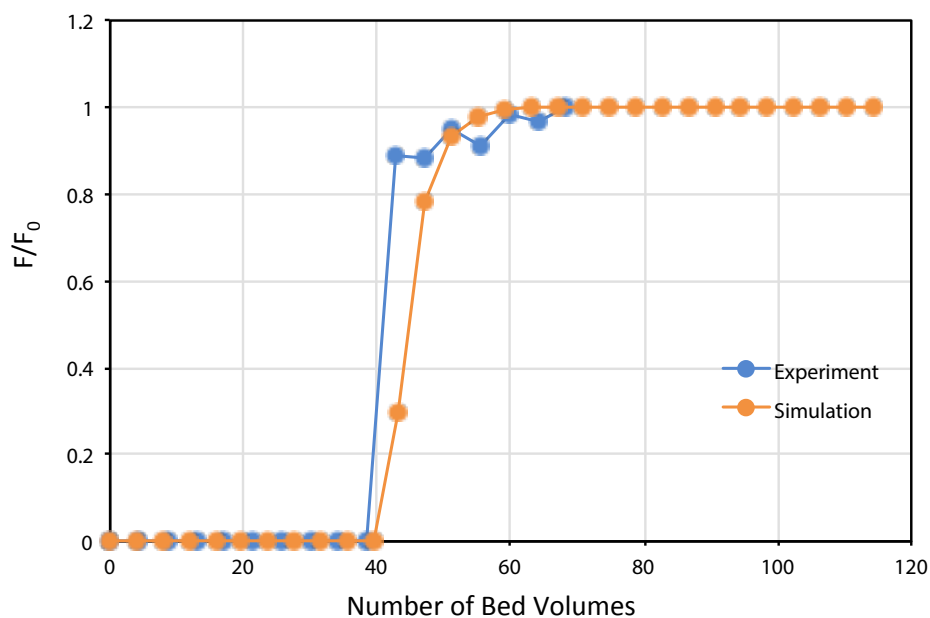

**Supplementary Figure 7.** Single component CO<sub>2</sub> breakthrough simulation and experiment. Simulations were performed using experimentally determined equilibrium isotherms and mass transfer coefficients were fit to match the breakthrough curve.

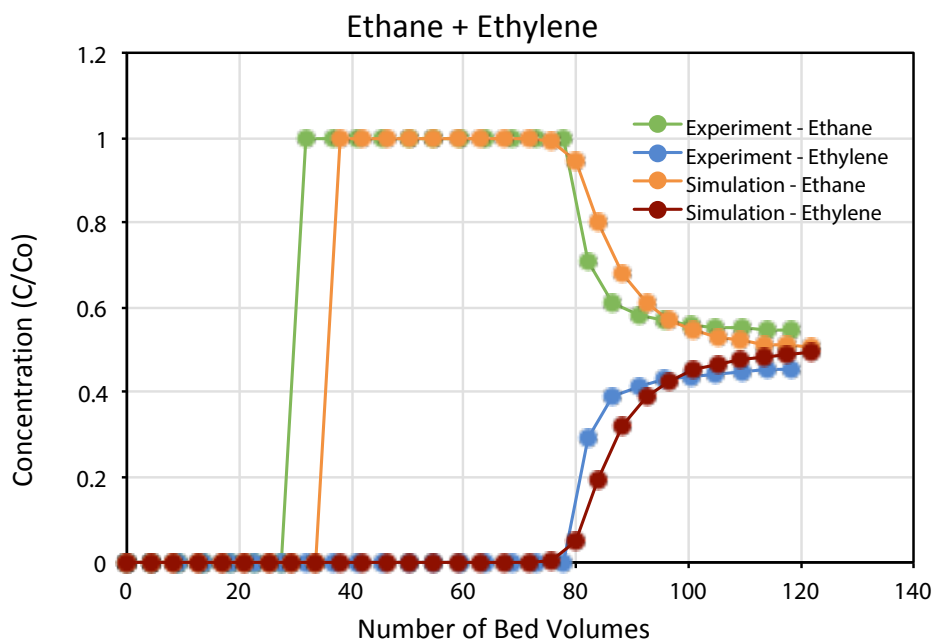

**Supplementary Figure 8.** Binary equimolar ethylene/ethane breakthrough simulation and experiment. Simulations were performed using experimentally determined equilibrium isotherms and mass transfer coefficients obtained from single-component breakthrough.

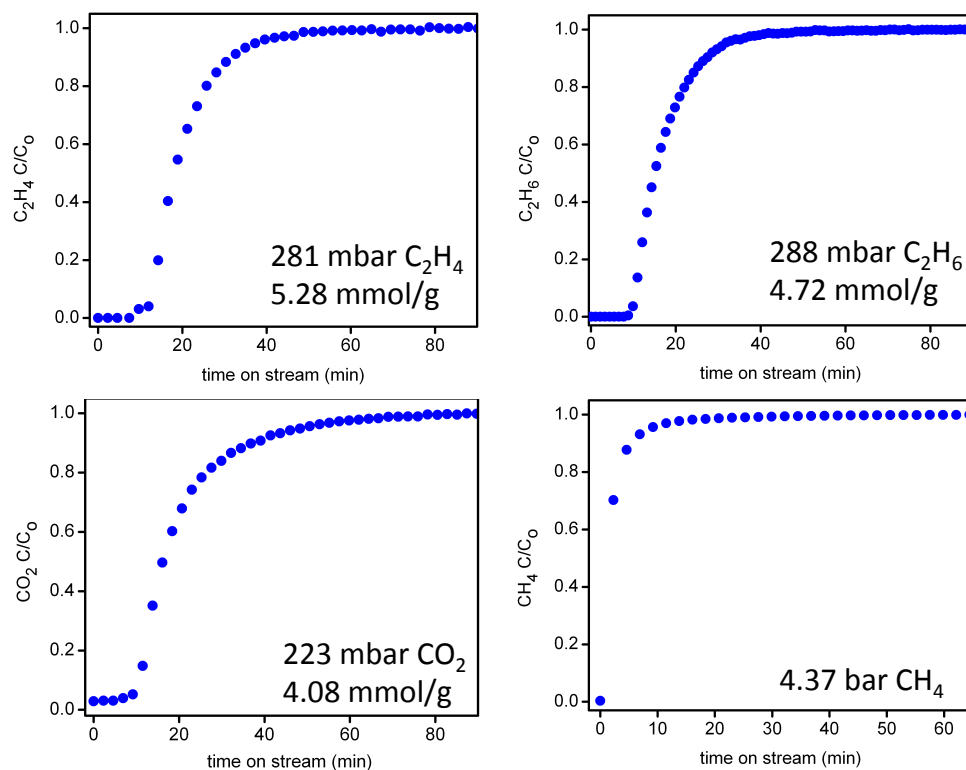

**Supplementary Figure 9.** Elevated pressure, single-component transient breakthrough curves for  $\text{Mn}_2(m\text{-dobdc})$ , including the partial pressure of each gas and the corresponding breakthrough capacity. Total pressure is 6.2 bar, with the remainder of the gas being He. Total flow rate is 40 sccm. Temperature is 25 °C.

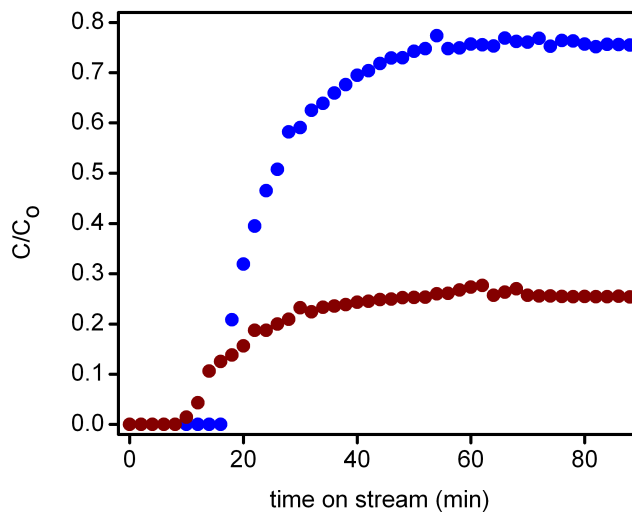

**Supplementary Figure 10.** Binary transient breakthrough curves of 3:1 ethylene:ethane in  $\text{Mn}_2(m\text{-dobdc})$ . Blue and red circles correspond to ethylene and ethane, respectively. Total pressure is 6.2 bar. Total flow rate is 40 sccm. Temperature is 25 °C.

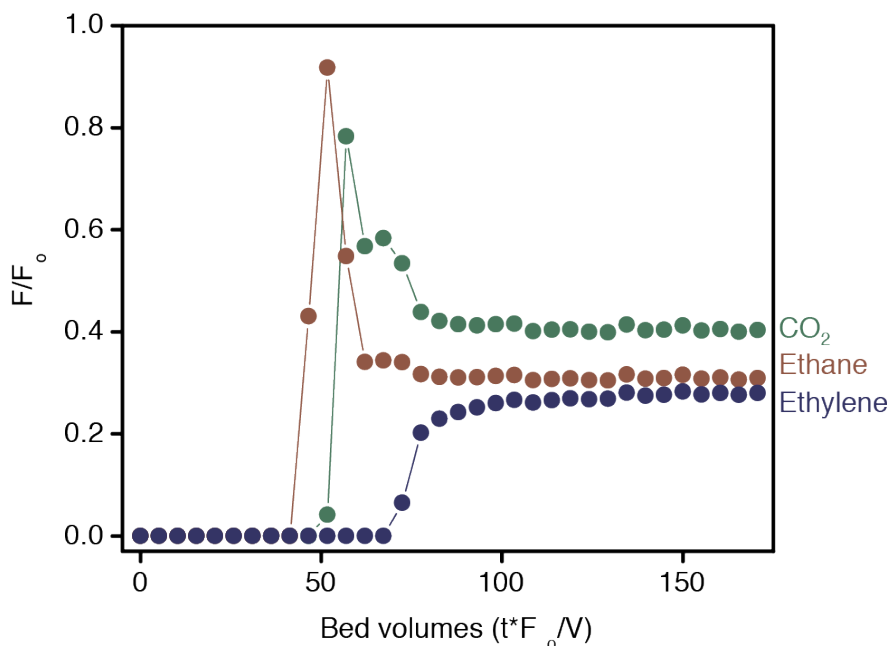

**Supplementary Figure 11.** Transient breakthrough curve of a CO<sub>2</sub>/ethylene/ethane mixture in Mn<sub>2</sub>(*m*-dobdc) at a total pressure of 1 bar and 25 °C.

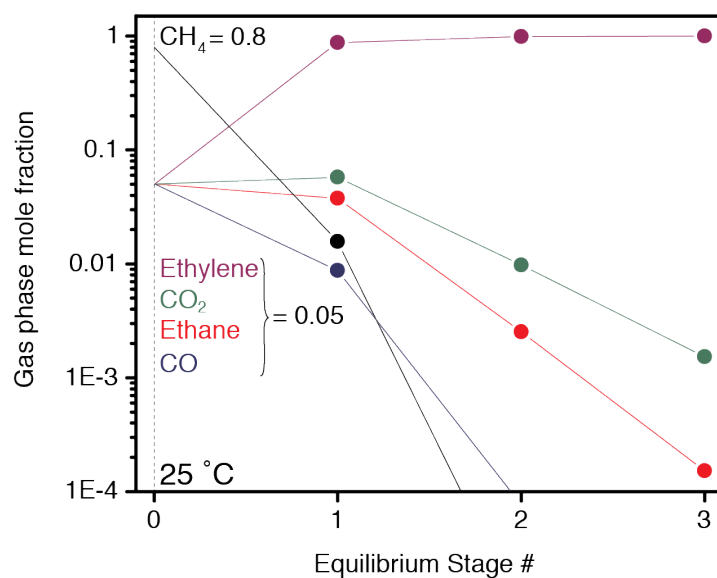

**Supplementary Figure 11.** 5-Component IAST simulation of an equilibrium stage separation. Initial feed composition, corresponding to stage 0, is 80% CH<sub>4</sub>, and 5% of ethylene, ethane, CO<sub>2</sub>, and CO. Subsequent equilibrium stage compositions represent the adsorbed phase mole fraction in equilibrium with a gas phase containing the composition from the previous equilibrium stage. After three equilibrium stages, the adsorbed phase is > 99.9% ethylene.

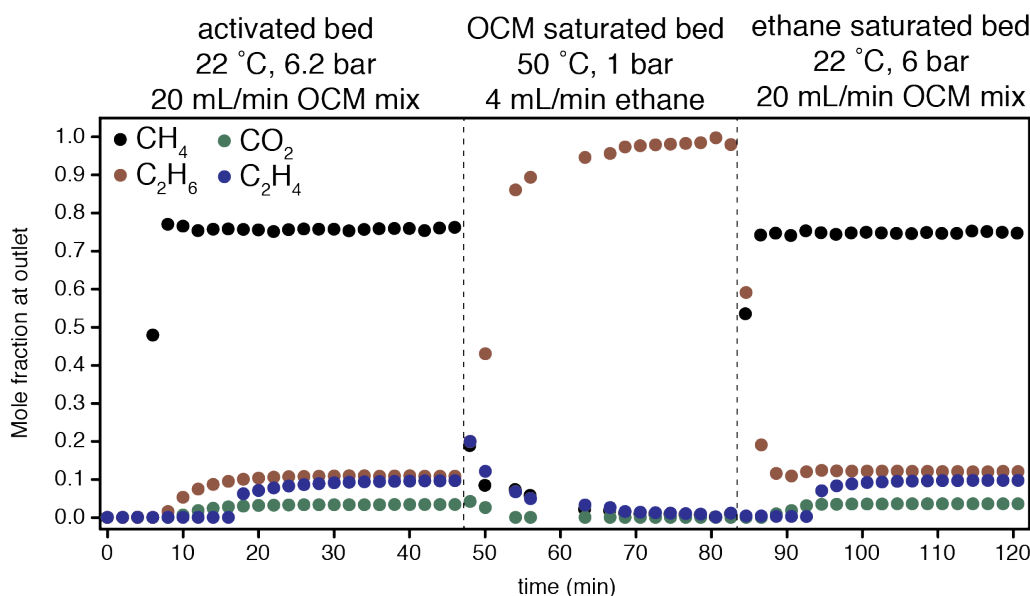

**Supplementary Figure 12.** Bed cycling experiment using an ethane purge and elevated temperature to regenerate the bed. The experiment is broken into three parts. The first section corresponds to the breakthrough of an OCM effluent gas stream on an activated bed at a total pressure of 6.2 bar and 22 °C. The second section corresponds to the gas phase being switched to an ethane purge and the temperature is raised to 50 °C. Correspondingly, ethylene and the other adsorbed components are purged from the bed. In the third section, the gas phase was returned to the OCM effluent composition. Ethylene selectivity is maintained after the purge phase.

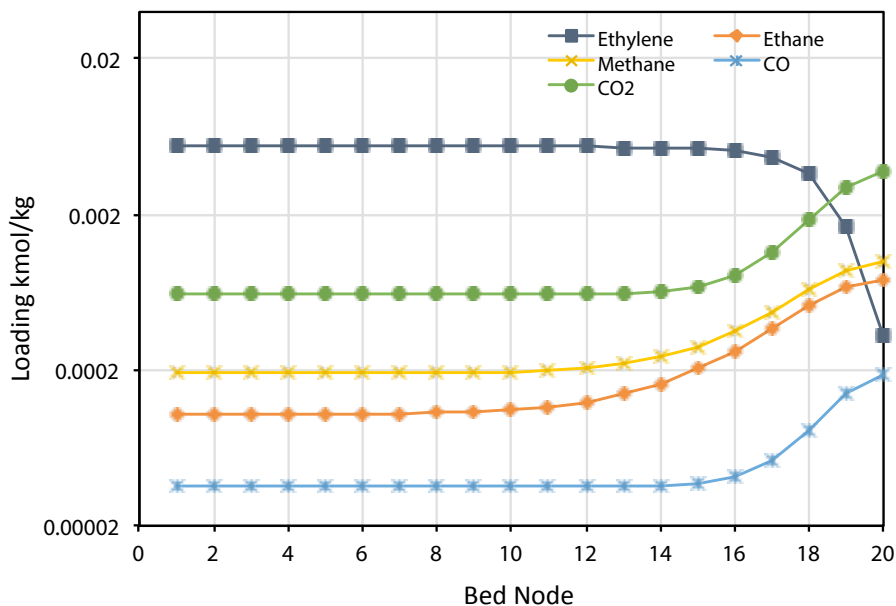

**Supplementary Figure 13.** Snapshot of the simulated adsorbent bed composition profile following bed saturation with a representative oxidative coupling of methane effluent mixture. The composition is profiled given ethylene recovery threshold of 1000 ppm ethylene at the outlet. The mass transfer zone indicates the portion of the column that is under non-equilibrium conditions. Upstream of the mass transfer zone is under equilibrium conditions. Bed utilization factor is 82%.
